# Supplementary material for: Risk profiles and pattern of antithrombotic use in patients with non-valvular atrial fibrillation in Thailand: a multicenter study
Source: PubMed Central journal article supplement (PMC6109333; doi:10.1186/s12872-018-0911-4), 2018-08-25
Supplement: 12872_2018_911_MOESM1_ESM.pdf [file 12872_2018_911_MOESM1_ESM.pdf]

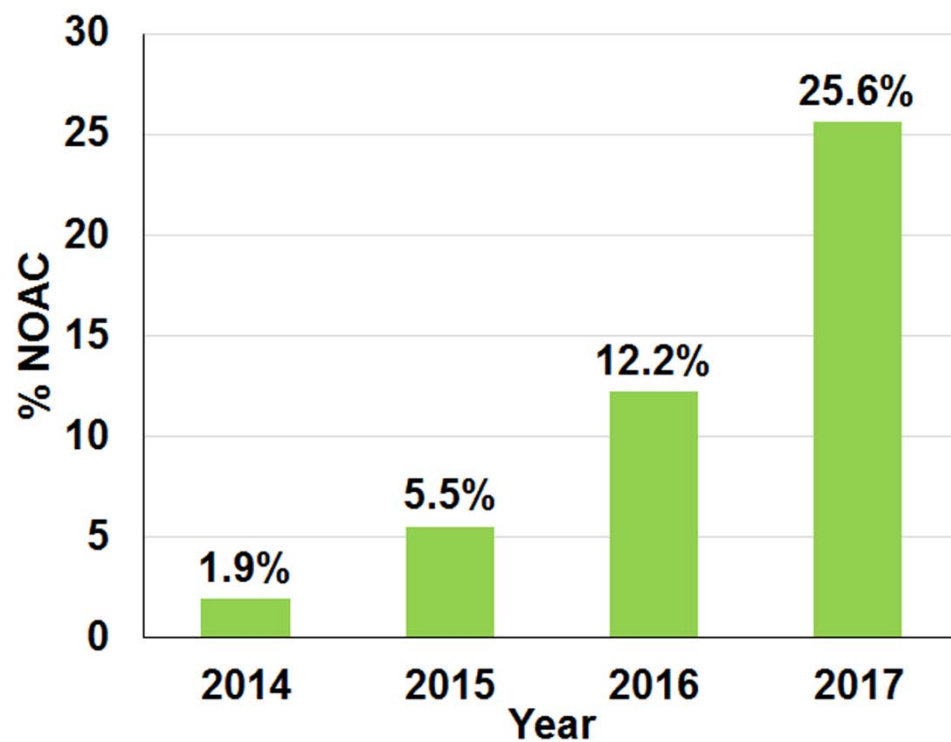

**Additional File 1.** Rate of NOAC use stratified by year of recruitment. Rate of NOAC use increases as the year of enrollment more recent.
